# Supplementary material
Source: Springer Nature journal article supplement (https://www.springermedizin.de/resource/supplementary/12936_2011_1986_MOESM1_ESM.pdf/9542140)

# Number of samples collected from Thai population in 6 regions of Thailand

Northern region: 6 samples

Northeastern region :21 samples

Western region: 217samples

Eastern region: 6 samples

Central region: 60 samples

Southern region : 7 samples

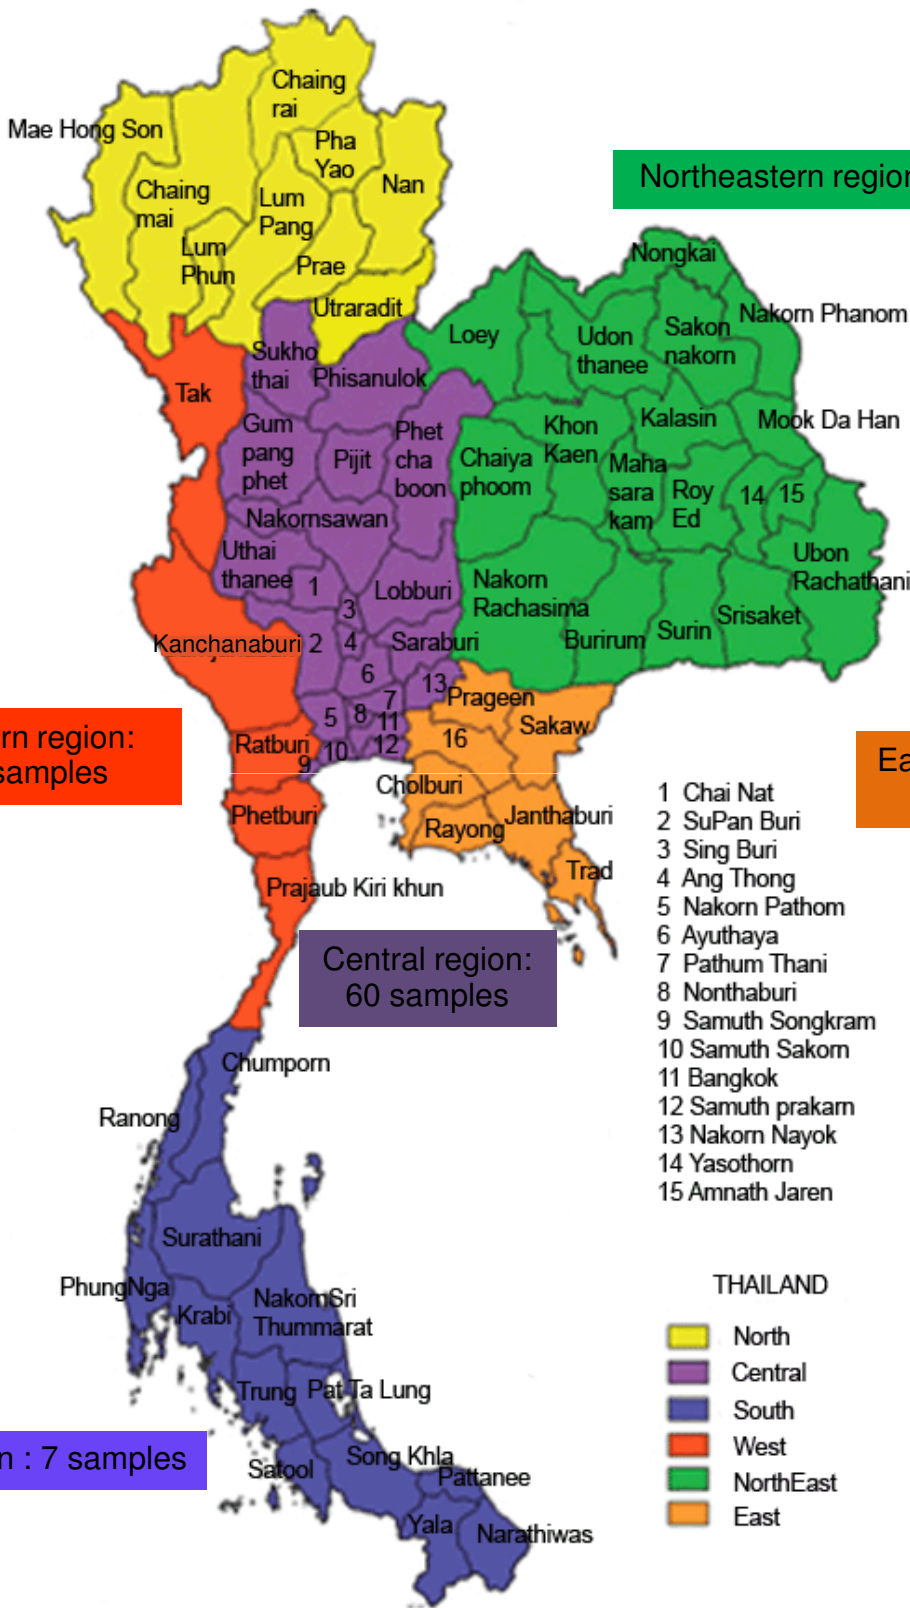

Supplement: MOESM1 [file 9542140]
